Report

## **A method for the generation of pseudotyped virus particles bearing SARS coronavirus spike protein in high yields**

Yoichiro Fujioka,<sup>1,2,\*</sup> Sayaka Kashiwagi,<sup>1,2</sup> Aiko Yoshida<sup>1,2</sup>, Aya O. Satoh,<sup>1</sup> Mari Fujioka,<sup>1</sup> Maho Amano<sup>1</sup>, Yohei Yamauchi<sup>3</sup>, and Yusuke Ohba<sup>1,2,4,\*</sup>

<sup>1</sup> Department of Cell Physiology, Faculty of Medicine and Graduate School of Medicine, Hokkaido University, Sapporo 060-8638, Japan

<sup>2</sup> Global Station for Biosurfaces and Drug Discovery, Hokkaido University, Sapporo 060-8612, Japan

<sup>3</sup> School of Cellular and Molecular Medicine, University of Bristol, University Walk, Bristol BS8 1TD, UK

<sup>4</sup> Lead Contact

\*Correspondence: y-fuji@med.hokudai.ac.jp, yohba@med.hokudai.ac.jp

Department of Cell Physiology, Faculty of Medicine and Graduate School of Medicine, Hokkaido University, N15W7, Kita-ku, Sapporo 060-8638, Japan.

phone: +81-11-706-5158; fax: +81-11-706-7877

1 **SUMMARY**

2 **The ongoing severe acute respiratory syndrome coronavirus 2 (SARS-CoV-2) pandemic**  
3 **has threatened human health and the global economy. Development of additional**  
4 **vaccines and therapeutics is urgently required, but such development with live virus**  
5 **must be conducted with biosafety level 3 confinement. Pseudotyped viruses have been**  
6 **widely adopted for studies of virus entry and pharmaceutical development to overcome**  
7 **this restriction. Here we describe a modified protocol to generate vesicular stomatitis**  
8 **virus (VSV) pseudotyped with SARS-CoV or SARS-CoV-2 Spike protein in high yield.**  
9 **We found that pseudovirions produced with the conventional transient expression**  
10 **system lacked coronavirus Spike protein at their surface as a result of inhibition of**  
11 **parental VSV infection by overexpression of this protein. Establishment of stable cell**  
12 **lines with an optimal expression level of coronavirus Spike protein allowed the efficient**  
13 **production of progeny pseudoviruses decorated with Spike protein. This improved VSV**  
14 **pseudovirus production method should facilitate studies of coronavirus entry and**  
15 **development of antiviral agents.**

16

17 **Keywords:** severe acute respiratory syndrome coronavirus (SARS-CoV), SARS-CoV-2,  
18 pseudovirus, vesicular stomatitis virus (VSV), Spike protein

19

## 1 INTRODUCTION

2 Severe acute respiratory syndrome coronavirus 2 (SARS-CoV-2) is an enveloped, positive-  
3 strand RNA virus that belongs to the *Coronaviridae* family and is responsible for the recent  
4 pandemic of coronavirus disease 2019 (COVID-19). As of 15 June 2021, there had been >174  
5 million confirmed cases of and ~3.7 million deaths from COVID-19 reported in over 220  
6 countries, areas, or territories ([https://www.who.int/emergencies/diseases/novel-coronavirus-](https://www.who.int/emergencies/diseases/novel-coronavirus-2019)  
7 2019).

8 The envelope of SARS-CoV-2, like that of SARS-CoV, contains three structural  
9 proteins: the spike glycoprotein (hereafter referred to simply as S protein), membrane protein,  
10 and small envelope protein (Schoeman and Fielding, 2019; Wrapp et al., 2020). Together with  
11 retrovirus envelope proteins and influenza virus hemagglutinin proteins, S protein is  
12 categorized as a class I viral fusion protein (Millet and Whittaker, 2018; White 2008), and it is  
13 targeted to the rough endoplasmic reticulum (rER) of host cells by an NH<sub>2</sub>-terminal signal  
14 sequence (Breitling and Aebi, 2013; Duan et al., 2020; Lontok et al., 2004; Sadasivan et al.,  
15 2017). Cleavage of the signal sequence is followed by resumption of peptide chain elongation  
16 and insertion of the synthesized S protein into the ER membrane as a homotrimer (Binns et al.,  
17 1985; Braakman and Hebert, 2013; Delmas and Laude, 1990; Duan et al., 2020). S protein  
18 plays a key role in both specific interaction of the virus with its host cell receptor and  
19 subsequent virus internalization via endocytosis or membrane fusion. Binding of the  
20 coronavirus to its host cell receptor, angiotensin-converting enzyme 2 (ACE2), has been  
21 attributed to the S1 receptor-binding subunit region of S protein, which adopts an active  
22 “standing-up” conformation for receptor binding and an inactive “lying-down” conformation  
23 for immune evasion (Guan et al., 2020; Wrapp et al., 2020). After the S1 subunit region binds  
24 to ACE2, S protein undergoes proteolytic cleavage into S1 and S2 fusion subunits at the  
25 S1/S2 site in the presence of transmembrane protease serine 2 (TMPRSS2) and furin (Bestle  
26 et al., 2020; Jaimes et al., 2020). Additional cleavage sites that are located within the S2  
27 subunit and are cleaved by host cell proteases including cathepsins, furin-like proprotein  
28 convertases, and trypsin-like serine protease (Burkard et al., 2014; Coutard et al., 2020;  
29 Hoffmann et al., 2020). The exposed S2 subunit mediates membrane fusion either at the  
30 plasma membrane or with the endosomal membrane, depending on protease availability in the  
31 host cell. Characterization of S protein is thus crucial for a better understanding of SARS-  
32 CoV-2 entry, but such studies are often limited because experiments with the live virus must  
33 be conducted in a biosafety level 3 (BSL-3) containment facility.

1 Pseudotyped virus systems are highly useful for characterization of viral envelope  
2 proteins and investigation of their role in virus entry (Hoffmann et al., 2020; Miyauchi et al.,  
3 2009; Nanbo et al., 2010; Rentsch and Zimmer, 2011; Schelhaas et al., 2012; de Vries et al.,  
4 2011). Virus particles produced with such a system consist of a surrogate viral core and  
5 heterologous viral envelope proteins. The genome of the parental virus is modified to remove  
6 essential genes for viral reproduction, so as to prevent the generation of infectious progeny  
7 viruses. This approach allows viruses pseudotyped with envelope proteins of highly  
8 pathogenic viruses to be handled safely in a BSL-2 containment facility instead of a BSL-3 or  
9 BSL-4 facility. Vesicular stomatitis virus (VSV), a negative-strand RNA virus of the  
10 *Rhabdoviridae* family, has been widely adopted in both pseudotyped and recombinant virus  
11 systems (Hoffmann et al., 2020; Miyauchi et al., 2009; Nanbo et al., 2010; Rentsch and  
12 Zimmer, 2011). It possesses five structural proteins—the glycoprotein (G), large polymerase  
13 protein (L), matrix protein (M), nucleocapsid (N), and phosphoprotein (P) (Lichty et al.,  
14 2004)—among which G protein contributes to binding to the host cell surface and fusion with  
15 the endosomal membrane. VSV was the first negative-strand RNA virus for which a reverse  
16 genetics approach was established (Lawson et al., 1995), an approach that allowed packaging  
17 of a reporter gene into the viral genome for quantitative evaluation of infectivity of  
18 recombinant viruses on the basis of the reporter gene activity. It was also found that a large  
19 amount of morphologically intact virus particles could be produced even in the absence of G  
20 protein. In addition, coinfection of cells with VSV and other viruses results in the formation  
21 of VSV pseudotyped with heterologous envelope proteins (Huang et al., 1974; Witte and  
22 Baltimore, 1977). With these features, VSV-based pseudotyping is a potentially powerful tool  
23 for studies of the role of envelope proteins, including S proteins of SARS-CoV and SARS-  
24 CoV-2, in virus entry (Clausen et al., 2020; Hoffmann et al., 2020).

25 During the course of experiments with VSV pseudoviruses bearing S protein of  
26 SARS-CoV or SARS CoV-2 described here, we found that most pseudotyped particles  
27 produced by the conventional transfection protocol lack S protein, likely because S protein  
28 expression at a high level in the virus-producing cells suppresses infection by parental VSV.  
29 We therefore developed an improved protocol based on cell lines stably expressing S proteins.  
30 This new method generates VSV pseudotyped particles decorated with S protein at high  
31 efficiency and with high infectious yields compared to the conventional approach. Our  
32 protocol increases the fidelity of SARS-CoV-2 entry research and should facilitate the  
33 development of new antiviral agents.

## 1   **RESULTS AND DISCUSSION**

2   We initially aimed to evaluate the loading efficiency of S proteins on VSV pseudotyped virus  
3   particles. According to the published protocol (Rentsch and Zimmer, 2011), HEK293T cells  
4   transiently expressing SARS-CoV S protein were exposed to VSV $\Delta$ G bearing G protein of  
5   VSV (VSV $\Delta$ G-G), and the resulting culture supernatant was harvested as a pseudovirus  
6   suspension in the presence of neutralizing antibodies to VSV G protein (to eliminate parental  
7   VSV $\Delta$ G-G). The pseudotyped virions obtained in this manner were stained with the lipophilic  
8   carbocyanine dye DiI and then subjected to immunofluorescence analysis with a rabbit  
9   monoclonal antibody to SARS-CoV S protein. Confocal fluorescence imaging revealed that  
10   only a small proportion of the obtained particles harbored S protein (**Figure 1A**).

11         To examine S protein expression in the pseudotyped virion-producing cells, we  
12   prepared an expression vector for a fluorescent protein-tagged form of the protein. The coding  
13   sequence for mCherry, a red fluorescent protein (RFP), was thus inserted upstream of the  
14   NH<sub>2</sub>-terminal signal sequence of S protein, with the expectation that the fluorescent tag would  
15   be cleaved together with the signal sequence in the ER and so would not suppress virion  
16   formation. Indeed, immunoblot analysis of HEK293T cells transfected with the vector for  
17   mCherry-tagged S protein revealed separate fragments corresponding to mCherry and to S  
18   protein (**Figure S1A**), and no red fluorescence signal was detected from the VSV $\Delta$ G-  
19   mCherry-S pseudoparticles produced by these cells (**Figure S1B**). Furthermore,  
20   determination of focus-forming units (FFU) by counting the number of cells positive for  
21   green fluorescent protein (GFP) encoded by the reporter gene packaged in the genome of  
22   parental VSV $\Delta$ G (Rentsch and Zimmer, 2011) did not reveal a marked difference in  
23   infectivity between VSV $\Delta$ G-mCherry-S and VSV $\Delta$ G-S pseudoviruses in BEAS-2B cells  
24   expressing ACE2, also a receptor for SARS-CoV (**Figure S1C**). This result also supported  
25   the notion that the chimeric protein undergoes proteolytic cleavage and does not inhibit  
26   particle formation.

27         Fluorescence imaging of HEK293T cells transfected with expression vectors for  
28   mCherry-S or mCherry showed that mCherry-S expression interfered with VSV $\Delta$ G-G  
29   infection; the GFP signal was thus detected in cells with no or only a low level of mCherry-S  
30   expression but not in highly red fluorescent cells (**Figure 1B**). Quantitative analysis revealed  
31   that GFP-positive cells were indeed highly enriched in cells in which red fluorescence  
32   intensity was <10,000 arbitrary units (A.U.) (**Figure 1C**), whereas a high level of mCherry  
33   expression only partially suppressed VSV $\Delta$ G-G infection (**Figure S1D**). These observations

1 also suggested that virus particles lacking envelope protein might be produced from cells with  
2 no mCherry-S expression. Indeed, immunofluorescence analysis with antibodies to VSV M  
3 protein showed that the supernatant of vector-transfected, VSV $\Delta$ G-G-exposed HEK293T  
4 cells contained fluorescent puncta even when the vector did not encode an envelope protein  
5 (**Figure S1E**).

6 Our results together suggested that a low and persistent level of S protein expression  
7 might be required for the production of pseudotyped virus particles that uniformly bear S  
8 protein. We therefore attempted to establish cell lines that stably express S protein. However,  
9 although HEK293T cells are used in the standard protocol for VSV-based pseudotyped virus  
10 production, we found that HEK293T cells expressing mCherry-S manifested a shrunken  
11 morphology compared with those expressing mCherry alone (**Figure S1F**). We next  
12 introduced the expression vector for mCherry-S into VeroE6 cells, which have been widely  
13 adopted for SARS-CoV research. Fluorescence imaging showed that the morphology of  
14 VeroE6 cells expressing mCherry-S was similar to that of those expressing mCherry alone  
15 (**Figure 2A**). To generate stable cell lines, we isolated transfected VeroE6 cells by treatment  
16 with trypsin and subjected them to puromycin selection. After incubation for 24 h,  
17 multinucleated cells, indicative of cell-cell fusion resulting from S protein activation by  
18 trypsin cleavage, were apparent for the cells expressing mCherry-S (**Figure 2B**). To avoid  
19 cleavage of S protein, we used enzyme-free cell-dissociation solutions for cell isolation.  
20 Treatment with such solutions did not induce cleavage of S protein (**Figure S2A**) or  
21 multinucleated cells (**Figure 2C**), thus allowing the generation of cell lines stably expressing  
22 S protein (**Figure 2D**).

23 We next examined whether such a cell line was susceptible to VSV $\Delta$ G-G infection for  
24 production of pseudoviruses harboring S protein. Fluorescence microscopy and quantitative  
25 analysis of the virus-exposed cells revealed that the mCherry fluorescence intensity of all  
26 cells was <10,000 A.U. (the desired upper limit as determined in **Figure 1C**), and that most  
27 cells were positive for GFP, indicative of uniform VSV $\Delta$ G-G infection (**Figures S2B** and  
28 **S2C**). The virus particles produced by the cells were then stained with DiD and adsorbed on a  
29 polyethylenimine-coated glass-based dish to determine the amount of particles per unit  
30 volume by measurement of the area of DiD-positive puncta with a confocal microscope. The  
31 amount of particles produced by VeroE6 cells stably expressing mCherry-S was ~10% of that  
32 of those produced by HEK293T cells transiently expressing mCherry-S (**Figures S3A** and  
33 **S3B**). BEAS-2B cells expressing ACE2 were then exposed to the pseudoviruses for 1 h at  
34 4°C (to allow for virus attachment) and subjected to immunofluorescence analysis with

1 antibodies to SARS-CoV S protein and to VSV M protein in order to allow visualization of S  
2 protein and all pseudovirus particles, respectively. Confocal imaging showed that, in contrast  
3 to the virus particles produced by transiently transfected HEK293T cells, essentially all virus  
4 particles produced by the stably transfected VeroE6 cell line were positive for S protein  
5 (**Figure 3A**). Indeed, quantitative analysis revealed that the fraction of S protein-positive  
6 particles generated by the stable cell line was about seven times that generated by the  
7 transiently transfected cells (**Figure 3B**). These results thus demonstrated the efficient  
8 production of pseudoviruses that were essentially all loaded with S protein by the stable cell  
9 line.

10 We further examined whether the titer of pseudovirus particles generated by the stable  
11 cell line was higher than that of particles generated by the conventional method. There was no  
12 significant difference between the FFU values obtained for the two types of pseudoviruses  
13 (**Figure S3C**). To normalize infectivity, we prepared dilutions of the virus suspensions (down  
14 to 1.0 FFU/ $\mu$ l) and plotted FFU against the area of puncta. A linear relation was apparent for  
15 each type of pseudovirus, although the slopes of the regression lines differed (**Figure S3D**).  
16 The FFU value normalized by the amount of viruses produced by the stable cell line was 6.4  
17 times the corresponding value for the viruses produced by the transiently transfected cells  
18 (**Figure 3C**), indicating that the modified method established in this study results in a  
19 substantial improvement in infectious pseudovirus particle production.

20 Finally, we attempted to produce pseudotyped virus particles with envelopes bearing  
21 the S protein of SARS-CoV-2 by our newly established protocol. We thus established a  
22 VeroE6 cell line that stably expresses SARS-CoV-2 S protein (**Figure S4A**). The fraction of  
23 SARS-CoV-2 S protein-positive puncta (**Figures 4A and 4B**) and FFU normalized by the area  
24 of DiD-positive puncta (**Figures 4C, S4B and S4C**) were five and seven times as high,  
25 respectively, for viruses produced from the VeroE6 cell line as were those for viruses  
26 produced from transiently transfected HEK293T cells. Our procedure was thus shown to be  
27 highly efficient with regard to pseudovirus production for studies of the entry of SARS-CoV  
28 or SARS-CoV-2.

29 In this study, we unexpectedly found that a large proportion of pseudotyped virus  
30 particles produced by the conventional protocol (Hoffmann et al., 2020; Rentsch and Zimmer,  
31 2011) did not bear coronavirus S proteins. This finding raised the concern that S protein-free  
32 virions might affect the entry process of, or cellular responses to, S protein-bearing particles  
33 and thereby confound experimental outcomes. We therefore established a modified protocol  
34 based on stable cell lines in order to generate pseudoviruses for which a large proportion of

1 the virus particles harbor heterologous envelope proteins. Alternative methods that are free of  
2 such issues relating to virus particles lacking envelope protein, including reverse genetic  
3 systems for in vitro virus assembly from SARS-CoV-2 full-length cDNA (Torii et al., 2021;  
4 Xie et al., 2020), have been developed. However, given that the VSV-based pseudotyped  
5 virus systems have been adopted by many researchers, the modification described here should  
6 be readily incorporated into current protocols and lead both to a better understanding of virus  
7 entry and to accelerated vaccine and therapeutic development for SARS-CoV-2.

## 9 **ACKNOWLEDGEMENTS**

10 We thank Dr. S. Pöhlmann for expression plasmids, viruses and cells, as well as A. Kikuchi  
11 for technical assistance. This work was supported in part by Grants-in-Aid from the Ministry  
12 of Education, Culture, Sports, Science and Technology of Japan (#26115701 and #15H01248),  
13 from the Japan Society for the Promotion of Science (#19H05411, #20H05872, #21H02735  
14 and #21H00413), and from the Japan Agency for Medical Research and Development  
15 (JP17fk0108124j0601), as well as by COVID-19 Drug and Vaccine Development Donation.

## 17 **AUTHOR CONTRIBUTIONS**

18 Conceptualization, Y.F. and Y.O.; Methodology, Y.F. and S.K.; Formal analysis, Y.F. and  
19 S.K.; Investigation, Y.F., S.K., A.Y., A.O.S., and M.F.; Resources, Y.F., S.K., A.Y., A.O.S.,  
20 and M.F.; Writing—original draft, Y.F. and Y.O.; Writing—review and editing, Y.F., M.A.,  
21 Y.Y., and Y.O.; Visualization, Y.F. and Y.O.; Supervision, Y.Y. and Y.O.; Project  
22 administration, Y.O.; Funding acquisition, Y.F. and Y.O.

## 24 **DECLARATION OF INTERESTS**

25 Y.F. and Y.O have a patent pending that includes claims relating to the present study. Other  
26 authors declare no competing interests.



## 1 REFERENCES

- 2 Bestle, D., Heindl, M.R., Limburg, H., van Lam van, T., Pilgram, O., Moulton, H., Stein,  
3 D.A., Harges, K., Eickmann, M., Dolnik, O., et al. (2020). TMPRSS2 and furin are both  
4 essential for proteolytic activation of SARS-CoV-2 in human airway cells. *Life Sci. Alliance*  
5 *3*, e202000786.
- 6 Binns, M.M., Bournsnel, M.E.G., Cavanagh, D., Pappin, D.J., and Brown, T.D. (1985).  
7 Cloning and sequencing of the gene encoding the spike protein of the coronavirus IBV. *J. Gen.*  
8 *Virol.* *66*, 719–726.
- 9 Braakman, I., and Hebert, D.N. (2013). Protein folding in the endoplasmic reticulum. *Cold*  
10 *Spring Harb. Perspect. Biol.* *5*, a013201.
- 11 Breitling, J., and Aebi, M. (2013). N-linked protein glycosylation in the endoplasmic  
12 reticulum. *Cold Spring Harb. Perspect. Biol.* *5*, a013359.
- 13 Burkard, C., Verheije, M.H., Wicht, O., van Kasteren, S.I., van Kuppeveld, F.J., Haagmans,  
14 B.L., Pelkmans, L., Rottier, P.J.M., Bosch, B.J., and de Haan, C.A.M. (2014). Coronavirus  
15 Cell Entry Occurs through the Endo-/Lysosomal Pathway in a Proteolysis-Dependent Manner.  
16 *PLOS Pathog.* *10*, e1004502.
- 17 Clausen, T.M., Sandoval, D.R., Spleid, C.B., Pihl, J., Perrett, H.R., Painter, C.D., Narayanan,  
18 A., Majowicz, S.A., Kwong, E.M., McVicar, R.N., et al. (2020). SARS-CoV-2 Infection  
19 Depends on Cellular Heparan Sulfate and ACE2. *Cell* *183*, 1043–1057.
- 20 Coutard, B., Valle, C., de Lamballerie, X., Canard, B., Seidah, N.G., and Decroly, E. (2020).  
21 The spike glycoprotein of the new coronavirus 2019-nCoV contains a furin-like cleavage site  
22 absent in CoV of the same clade. *Antiviral Res.* *176*, 104742.
- 23 Daly, J.L., Simonetti, B., Klein, K., Chen, K.E., Williamson, M.K., Antón-Plágaro, C.,  
24 Shoemark, D.K., Simón-Gracia, L., Bauer, M., Hollandi, R., et al. (2020). Neuropilin-1 is a  
25 host factor for SARS-CoV-2 infection. *Science* *370*, 861–865.
- 26 Delmas, B., and Laude, H. (1990). Assembly of coronavirus spike protein into trimers and its  
27 role in epitope expression. *J. Virol.* *64*, 5367–5375.
- 28 Duan, L., Zheng, Q., Zhang, H., Niu, Y., Lou, Y., and Wang, H. (2020). The SARS-CoV-2  
29 Spike Glycoprotein Biosynthesis, Structure, Function, and Antigenicity: Implications for the  
30 Design of Spike-Based Vaccine Immunogens. *Front. Immunol.* *11*, 2593.
- 31 Fujioka, Y., Nishide, S., Ose, T., Suzuki, T., Kato, I., Fukuhara, H., Fujioka, M., Horiuchi, K.,  
32 Satoh, A.O., Nepal, P., et al. (2018). A Sialylated Voltage-Dependent Ca<sup>2+</sup> Channel Binds  
33 Hemagglutinin and Mediates Influenza A Virus Entry into Mammalian Cells. *Cell Host*  
34 *Microbe* *23*, 809–818.
- 35 Fujioka, Y., Satoh, A.O., Horiuchi, K., Fujioka, M., Tsutsumi, K., Sasaki, J., Nepal, P.,  
36 Kashiwagi, S., Paudel, S., Nishide, S., et al. (2019). A Peptide Derived from Phosphoinositide  
37 3-kinase Inhibits Endocytosis and Influenza Virus Infection. *Cell Struct. Funct.* *44*, 61–74.
- 38 Guan, H., Wang, Y., Perčulija, V., Saeed, A.F.U.H., Liu, Y., Li, J., Jan, S.S., Li, Y., Zhu, P.,  
39 and Ouyang, S. (2020). Cryo-electron Microscopy Structure of the Swine Acute Diarrhea

- 1 Syndrome Coronavirus Spike Glycoprotein Provides Insights into Evolution of Unique  
2 Coronavirus Spike Proteins. *J. Virol.* *94*, e01301-20.
- 3 Hoffmann, M., Kleine-Weber, H., Schroeder, S., Krüger, N., Herrler, T., Erichsen, S.,  
4 Schiergens, T.S., Herrler, G., Wu, N.H., Nitsche, A., et al. (2020). SARS-CoV-2 Cell Entry  
5 Depends on ACE2 and TMPRSS2 and Is Blocked by a Clinically Proven Protease Inhibitor.  
6 *Cell* *181*, 271-280.e8.
- 7 Huang, A.S., Palma, E.L., Hewlett, N., and Roizman, B. (1974). Pseudotype formation  
8 between enveloped RNA and DNA viruses. *Nature* *252*, 743–745.
- 9 Jaimes, J.A., Millet, J.K., and Whittaker, G.R. (2020). Proteolytic Cleavage of the SARS-  
10 CoV-2 Spike Protein and the Role of the Novel S1/S2 Site. *iScience* *23*, 101212.
- 11 Kashiwagi, S., Fujioka, Y., Satoh, A.O., Yoshida, A., and Fujioka, M. (2019a). Folding  
12 latency of fluorescent proteins affects the mitochondrial localization of fusion proteins. *Cell*  
13 *Struct. Funct.* *44*, 183–194.
- 14 Kashiwagi, S., Fujioka, Y., Kondo, T., Satoh, A.O., and Yoshida, A. (2019b). Localization of  
15 BCR-ABL to stress granules contributes to its oncogenic function. *Cell Struct. Funct.* *44*,  
16 195–204.
- 17 Lawson, N.D., Stillman, E.A., Whitt, M.A., and Rose, J.K. (1995). Recombinant vesicular  
18 stomatitis viruses from DNA. *Proc. Natl. Acad. Sci. USA* *92*, 4477–4481.
- 19 Lichty, B.D., Power, A.T., Stojdl, D.F., and Bell, J.C. (2004). Vesicular stomatitis virus: Re-  
20 inventing the bullet. *Trends Mol. Med.* *10*, 210–216.
- 21 Lontok, E., Corse, E., and Machamer, C.E. (2004). Intracellular Targeting Signals Contribute  
22 to Localization of Coronavirus Spike Proteins near the Virus Assembly Site. *J. Virol.* *78*,  
23 5913–5922.
- 24 Millet, J.K., and Whittaker, G.R. (2018). Physiological and molecular triggers for SARS-CoV  
25 membrane fusion and entry into host cells. *Virology* *517*, 3–8.
- 26 Miyauchi, K., Kim, Y., Latinovic, O., Morozov, V., and Melikyan, G.B. (2009). HIV Enters  
27 Cells via Endocytosis and Dynamin-Dependent Fusion with Endosomes. *Cell* *137*, 433–444.
- 28 Miyoshi, H., Blömer, U., Takahashi, M., Gage, F.H., and Verma, I.M. (1998). Development  
29 of a Self-Inactivating Lentivirus Vector. *J. Virol.* *72*, 8150–8157.
- 30 Nanbo, A., Imai, M., Watanabe, S., Noda, T., Takahashi, K., Neumann, G., Halfmann, P., and  
31 Kawaoka, Y. (2010). Ebolavirus is internalized into host cells via macropinocytosis in a viral  
32 glycoprotein-dependent manner. *PLOS Pathog.* *6*, e1001121.
- 33 Rentsch, M.B., and Zimmer, G. (2011). A vesicular stomatitis virus replicon-based bioassay  
34 for the rapid and sensitive determination of multi-species type I interferon. *PLOS ONE* *6*,  
35 e25858.
- 36 Sadasivan, J., Singh, M., and Sarma, J. Das (2017). Cytoplasmic tail of coronavirus spike  
37 protein has intracellular targeting signals. *J. Biosci.* *42*, 231–244.

- 1 Schelhaas, M., Shah, B., Holzer, M., Blattmann, P., Kühling, L., Day, P.M., Schiller, J.T., and  
2 Helenius, A. (2012). Entry of human papillomavirus type 16 by actin-dependent, clathrin- and  
3 lipid raft-independent endocytosis. *PLOS Pathog.* 8, e1002657.
- 4 Schoeman, D., and Fielding, B.C. (2019). Coronavirus envelope protein: Current knowledge.  
5 *Virology* 16, 1–22.
- 6 Torii, S., Ono, C., Suzuki, R., Morioka, Y., Anzai, I., Fauzyah, Y., Maeda, Y., Kamitani, W.,  
7 Fukuhara, T., and Matsuura, Y. (2021). Establishment of a reverse genetics system for SARS-  
8 CoV-2 using circular polymerase extension reaction. *Cell Rep.* 35, 109014.
- 9 de Vries, E., Tscherne, D.M., Wienholts, M.J., Cobos-Jiménez, V., Scholte, F., García-Sastre,  
10 A., Rottier, P.J.M., and de Haan, C.A.M. (2011). Dissection of the influenza A virus endocytic  
11 routes reveals macropinocytosis as an alternative entry pathway. *PLOS Pathog.* 7, e1001329.
- 12 Witte, O.N., and Baltimore, D. (1977). Mechanism of formation of pseudotypes between  
13 vesicular stomatitis virus and murine leukemia virus. *Cell* 11, 505–511.
- 14 Wrapp, D., Wang, N., Corbett, K.S., Goldsmith, J.A., Hsieh, C.-L., Abiona, O., Graham, B.S.,  
15 and McLellan, J.S. (2020). Cryo-EM structure of the 2019-nCoV spike in the prefusion  
16 conformation. *Science* 367, 1260–1263.
- 17 Xie, X., Muruato, A., Lokugamage, K.G., Narayanan, K., Zhang, X., Zou, J., Liu, J.,  
18 Schindewolf, C., Bopp, N.E., Aguilar, P. V., et al. (2020). An Infectious cDNA Clone of  
19 SARS-CoV-2. *Cell Host Microbe* 27, 841-848.e3.

20

## 1 **STAR Methods**

### 2 **Contact for reagent and resource sharing**

3 Further information and requests for resources and reagents should be directed to and will be  
4 fulfilled by the Lead Contact, Yusuke Ohba (yohba@med.hokudai.ac.jp).

### 5 **Cell lines**

6 HEK293T (ATCC CRL-11268), VeroE6 (CRL-1586), and BEAS-2B (CRL-9609) cells were  
7 obtained from American Type Culture Collection (ATCC; Manassas, VA) and were  
8 maintained under a humidified atmosphere of 5% CO<sub>2</sub> at 37°C in Dulbecco's modified  
9 Eagle's medium (DMEM) (Sigma-Aldrich, Tokyo, Japan) supplemented with 10% fetal  
10 bovine serum (FBS) (Capricorn Scientific, Ebsdorfergrund, Germany). BHK21/G43 were  
11 kindly provided by S. Pöhlmann (Leibniz Institute for Primate Research, Göttingen,  
12 Germany). Expression plasmids were introduced into cells by transfection for 24 h with the  
13 use of Polyethylenimine "Max" (PEI MAX; Polysciences, Warrington, PA). The absence of  
14 mycoplasma contamination was confirmed with the use of a PCR Mycoplasma Test Kit  
15 (Takara, Shiga, Japan).

### 16 **Reagents and antibodies**

17 Antibodies to SARS-CoV S protein (#40150-R007), to RFP (#PM005), to VSV G protein  
18 (#EB0010), and to VSV M protein (#MABF2347) were obtained from Sino Biological  
19 (Beijing, China), Medical & Biological Laboratory (Nagoya, Japan), Kerabast (Boston, MA),  
20 and Merck (Darmstadt, Germany), respectively. Hoechst 33342, carbocyanine dyes (DiO, DiI,  
21 and DiD), and Alexa Fluor 647- or Alexa Fluor 488-labeled antibodies to rabbit or mouse  
22 immunoglobulin G were obtained from Thermo Fisher Scientific (Carlsbad, CA). Horseradish  
23 peroxidase (HRP)-conjugated goat secondary antibodies were obtained from Jackson  
24 ImmunoResearch Laboratories (West Grove, PA). Trypsin was obtained from FujiFilm-Wako  
25 (Osaka, Japan), and cell-dissociation solutions were from Thermo Fisher Scientific and  
26 Biological Industries (Beit-Haemek, Israel). Mifepristone was obtained from Sigma-Aldrich.

### 27 **Plasmids**

28 Expression vectors for the S protein of SARS-CoV or SARS-CoV-2 (pCG1-SARS-CoV-S  
29 and pCG1-SARS-CoV-2-S) (Hoffmann et al., 2020) were kindly provided by S. Pöhlmann.  
30 The coding sequence for mCherry was cleaved out of pFX-Tom20-mCherry (Kashiwagi et al.,  
31 2019a) by digestion with *Bam*HI and *Bgl*II, and was then subcloned into the *Bam*HI sites of  
32 the expression vectors for the S proteins to obtain pCG1-mCherry-SARS-CoV-S and pCG1-

1 mCherry-SARS-CoV-2-S. The pBABE-puro plasmid encoding a puromycin resistance gene  
2 was obtained from Addgene.

### 3 **Generation of stable cell lines**

4 pCG1-mCherry-SARS-CoV-S or pCG1-mCherry-SARS-CoV-2-S was linearized with *PvuI*  
5 and introduced together with pBABE-puro into HEK293T or VeroE6 cells by transfection for  
6 24 h with the use of PEI MAX. The cells were then cultured in DMEM supplemented with  
7 10% FBS and puromycin (10 µg/ml), and puromycin-resistant colonies were collectively  
8 harvested. Expression of the mCherry-tagged S proteins was confirmed by  
9 immunofluorescence analysis.

10 BEAS-2B cells stably expressing human ACE2 were generated by lentivirus-mediated  
11 gene transfer. HEK293T cells were thus transfected with pLVX-ACE2-IRES-BLD (Daly et  
12 al., 2020), pCAG-HIVgp, and pCMV-VSVG-RSV-Rev (Miyoshi et al., 1998) for 48 h, after  
13 which the culture supernatant was collected. BEAS-2B cells were exposed to the recombinant  
14 lentivirus-containing supernatant for 1 h at 35°C, cultured for 2 days at 35°C in DMEM  
15 supplemented with 10% FBS, and further cultured for 14 days in DMEM supplemented with  
16 10% FBS and blasticidin (20 µg/ml) (Funakoshi, Tokyo, Japan). The resulting blasticidin-  
17 resistant colonies were collectively harvested, and the constituent cells were maintained in  
18 DMEM supplemented with 10% FBS and blasticidin (15 µg/ml).

### 19 **Preparation of VSV pseudoviruses**

20 Pseudotyped viruses were generated according to an established protocol (Rentsch and  
21 Zimmer, 2011) or its modified version developed in the present study. In brief, for preparation  
22 of VSVΔG-G, BHK21/G43 cells (which stably express VSV G protein) were incubated with  
23 mifepristone (10 nM) for 6 h and then infected with VSVΔG at a multiplicity of infection  
24 (MOI) of 100,000 FFU per cell for 16 h at 35°C. For generation of VSVΔG-S particles, cells  
25 expressing S protein of SARS-CoV or SARS-CoV-2 (either stably or transiently) were  
26 exposed to VSVΔG-G at an MOI of 3 FFU per cell for 16 h at 35°C in the presence of  
27 antibodies to VSV G in order to neutralize the parental viruses. The culture supernatants were  
28 passed through a filter (pore size of 0.45 µm) and subjected to ultracentrifugation, and the  
29 virus pellets were resuspended in phenol red-free DMEM/F12 (Thermo Fisher Scientific) and  
30 stored at -80°C until use. Given that the enhanced GFP (EGFP) gene is packaged in the  
31 genome of the pseudoviruses in this system (Rentsch and Zimmer, 2011), the titer of  
32 infectious viruses in culture supernatants can be determined by counting GFP-positive cells  
33 with use of a fluorescence microscope.

## 1 **Determination of FFU**

2 BEAS-2B cells expressing ACE2 were incubated with pseudotyped viruses for 2 h at 35°C,  
3 and the culture supernatants were then removed and the cells cultured in DMEM for 16 h at  
4 35°C before staining with Hoechst 33342 for 15 min and examination with a fluorescence  
5 microscope. The FFU value of the pseudovirus suspension was determined by counting the  
6 number of GFP-positive cells with the use of the “Multi-wavelength cell scoring” module of  
7 MetaMorph software (Molecular Devices, CA).

## 8 **Fluorescence microscopy**

9 Fluorescence imaging and data analysis were performed essentially as described previously  
10 (Fujioka et al., 2019; Kashiwagi et al., 2019b). In brief, cells transfected with mCherry-CoV-  
11 S or mCherry-CoV-2-S vectors were stained with Hoechst 33342 for 15 min and placed in a  
12 stage-top incubation chamber maintained at 37°C on a Nikon Ti2 microscope (Nikon, Tokyo,  
13 Japan) equipped with a Zyla5.5 scientific complementary metal oxide semiconductor camera  
14 (Oxford Instruments, Belfast, UK). The cells were illuminated with an X-Cite turbo system  
15 (Excelitas Technologies, Waltham, MA) through a GFP HQ, Cy3 HQ, or DAPI-U HQ  
16 excitation filter (Nikon).

## 17 **Fluorescent labeling of pseudoviruses**

18 For preparation of fluorescently labeled pseudoviruses, 1 ml of pseudovirus suspension was  
19 incubated for 1 h at room temperature with 6 µl of 100 µM DiD, DiI, or DiO stock solution in  
20 the dark (Fujioka et al., 2018; Nanbo et al., 2010). The stained particles were adsorbed to a  
21 PEI MAX-coated 96-well glass-based plate and observed with a confocal microscope.

## 22 **Immunofluorescence analysis**

23 BEAS-2B cells expressing ACE2 were incubated with pseudotyped viruses for 1 h at 4°C to  
24 allow for virus attachment. The cells were then fixed with 3% paraformaldehyde for 15 min at  
25 room temperature and incubated with 1% bovine serum albumin to block nonspecific binding  
26 of antibodies. They were further incubated overnight at 4°C with primary antibodies (1:1000  
27 dilution), after which immune complexes were detected by incubation for 1 h at room  
28 temperature in the dark with Alexa Fluor 488- or Alexa Fluor 647-conjugated secondary  
29 antibodies (1:250 dilution). Nuclei were visualized by staining with Hoechst 33342. Images  
30 were acquired with an IX83 microscope (Olympus, Tokyo, Japan) with X-lightV3  
31 (CrestOptics, Rome, Italy).

1 **Immunoblot analysis**

2 Transfected HEK293T cells were lysed in a lysis buffer [50 mM Tris-HCl (pH 7.4), 150 mM  
3 NaCl, 1% Nonidet P-40, 0.5% sodium deoxycholate, 0.1% SDS, 1 mM Na<sub>3</sub>VO<sub>4</sub>, cOmplete  
4 Protease Inhibitor Cocktail (Sigma-Aldrich)] for 30 min on ice. The lysates were centrifuged  
5 at 20,000 × *g* for 10 min at 4°C, and the resulting supernatants were subjected to SDS-  
6 polyacrylamide gel electrophoresis. The separated proteins were transferred to a  
7 polyvinylidene difluoride membrane (Bio-Rad, Hercules, CA) and subjected to immunoblot  
8 analysis. Immune complexes were detected with HRP-conjugated secondary antibodies, ECL  
9 Western Blotting Detection Reagent (Cytiva, Tokyo, Japan) and a MIIS imaging system  
10 (Givetechs, Sakura, Japan).

11 **Quantification and statistical analysis**

12 Quantitative data are presented as means + SEM from at least three independent experiments  
13 and were compared with Student's *t* test (parametric test between two conditions) or by one-  
14 way analysis of variance (ANOVA) followed by the Tukey honestly significant difference  
15 (HSD) post hoc test (among multiple conditions). No statistical methods were applied to  
16 predetermine sample size. Experiments were performed unblinded. A *p* value of <0.05 was  
17 considered statistically significant, and all statistical analysis was performed with JMP Pro  
18 software (version 15.0.0).

## FIGURE LEGENDS

### **Figure 1. Pseudotyped virus particles produced from cells transiently expressing SARS-CoV S protein are not loaded with S protein**

(A) HEK293T cells were transfected with an expression vector for SARS-CoV S protein as well as infected with VSV $\Delta$ G-G. The culture supernatant was collected and stained with DiI as well as subjected to immunofluorescence staining with antibodies to SARS-CoV S protein and Alexa Fluor 488–conjugated secondary antibodies. The virus particles were then adsorbed onto a polyethylenimine-coated glass-based plate and observed with a confocal fluorescence microscope. Representative images are shown. Bars, 10  $\mu$ m.

(B) HEK293T cells were transfected with an expression vector for mCherry-tagged SARS-CoV S protein and infected with VSV $\Delta$ G-G for 16 h. They were then observed with a fluorescence microscope for detection of mCherry (red) and GFP (green) fluorescence. Representative images are shown. The boxed region in the lower right panel is shown at higher magnification in the other panels. Bars, 10  $\mu$ m.

(C) Fluorescence intensities of GFP and mCherry in individual cells as in (B).

See also **Figure S1**.

### **Figure 2. Trypsin treatment induces cell-cell fusion of S protein-expressing cells**

(A) VeroE6 cells transfected with an expression vector for mCherry or mCherry-tagged S protein of SARS-CoV (mCherry-S) that had been linearized with *Pvu*I were stained with Hoechst 33342 and observed by fluorescence microscopy. Representative images of mCherry (magenta) and Hoechst 33342 (blue) fluorescence are shown. Bars, 10  $\mu$ m.

(B and C) Cells prepared as in (A) were harvested by exposure to trypsin (B) or to enzyme-free cell dissociation solutions from Biological Industries (BI) or Gibco (C). They were then transferred to cell culture dishes and cultured for 24 h before fluorescence microscopic analysis as in (A). Representative images are shown. Bars, 10  $\mu$ m.

(D) Cells transfected with the mCherry-S vector (or the corresponding empty vector) as in (A) were cultured in the presence of puromycin for 14 days, stained with Hoechst 33342, and subjected to immunofluorescence analysis with antibodies to SARS-CoV S protein and Alexa Fluor 488–conjugated secondary antibodies. Representative fluorescence microscopic images of S protein immunostaining (green) as well as of mCherry (magenta) and Hoechst 33342 (blue) fluorescence are shown. Bars, 10  $\mu$ m.

See also **Figure S2**.

### **Figure 3. A large proportion of pseudotyped virus particles produced from VeroE6 cells stably expressing SARS-CoV S protein are loaded with S protein.**

(A) VeroE6 cells stably expressing or HEK293T cells transiently expressing SARS-CoV S protein were infected with VSV $\Delta$ G-G for 16 h, and equal numbers of pseudoviruses released into the culture supernatants were added to ACE2-expressing BEAS-2B cells for 1 h at 4°C. The latter cells were then fixed, stained with Hoechst 33342 (blue), subjected to immunofluorescence analysis with antibodies to SARS-CoV S protein and VSV M protein, and observed with a confocal microscope. Representative images are shown. The boxed



regions in the right panels are shown at higher magnification in the panels to the left. Bars, 10  $\mu\text{m}$ .

(B) Quantification of the fraction of S protein-positive puncta among all M protein-positive puncta for images as in (A). Data are means + SEM from three independent experiments. \*,  $p < 0.001$  (Student's *t* test).

(C) BEAS-2B cells stably expressing ACE2 were exposed to pseudotyped viruses prepared as in (A) for determination of the number of GFP-positive cells and calculation of FFU of virus suspension. FFU was normalized by the amount of pseudotyped viruses, which was determined by the area of puncta of DiD-stained viruses on a polyethylenimine-coated glass-based plate. Data are means + SEM from three independent experiments. \*,  $p < 0.004$  (one-way ANOVA with Tukey's HSD post hoc test).

See also **Figure S3**.

**Figure 4. Production of pseudoviruses loaded with S protein of SARS-CoV-2 by a stable cell line**

(A) BEAS-2B cells expressing ACE2 were exposed for 1 h at 4°C to pseudotyped viruses produced from a VeroE6 cell line stably expressing or HEK293T cells transiently expressing S protein of SARS-CoV-2. The cells were then fixed, stained with Hoechst 33342 (blue), subjected to immunofluorescence staining with antibodies to SARS-CoV S protein and VSV M protein, and examined with a confocal microscope. Representative images are shown. The boxed regions in the bottom panels are shown at higher magnification in the panels above. Bars, 10  $\mu\text{m}$ .

(B) Quantification of the fraction of S protein-positive puncta among all M protein-positive puncta in images as in (A). Data are means + SEM from three independent experiments. \* $p < 0.001$  (Student's *t* test).

(C) FFU normalized by the area of puncta for the pseudoviruses produced as in (A) was determined as in **Figure S4**. Data are means + SEM from three independent experiments. \*,  $p < 0.004$  (one-way ANOVA with Tukey's HSD post-hoc test).

See also **Figure S4**.

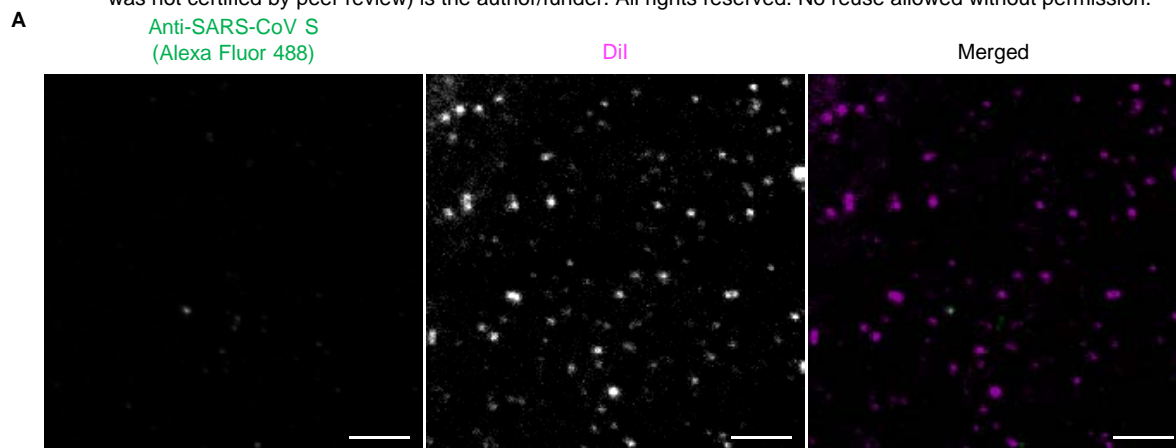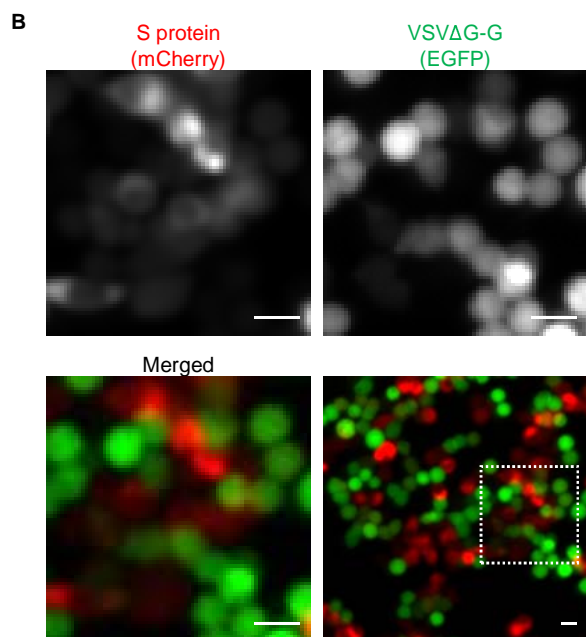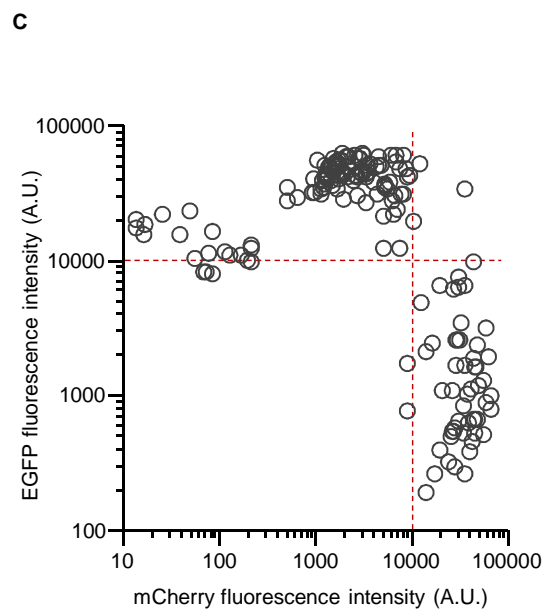

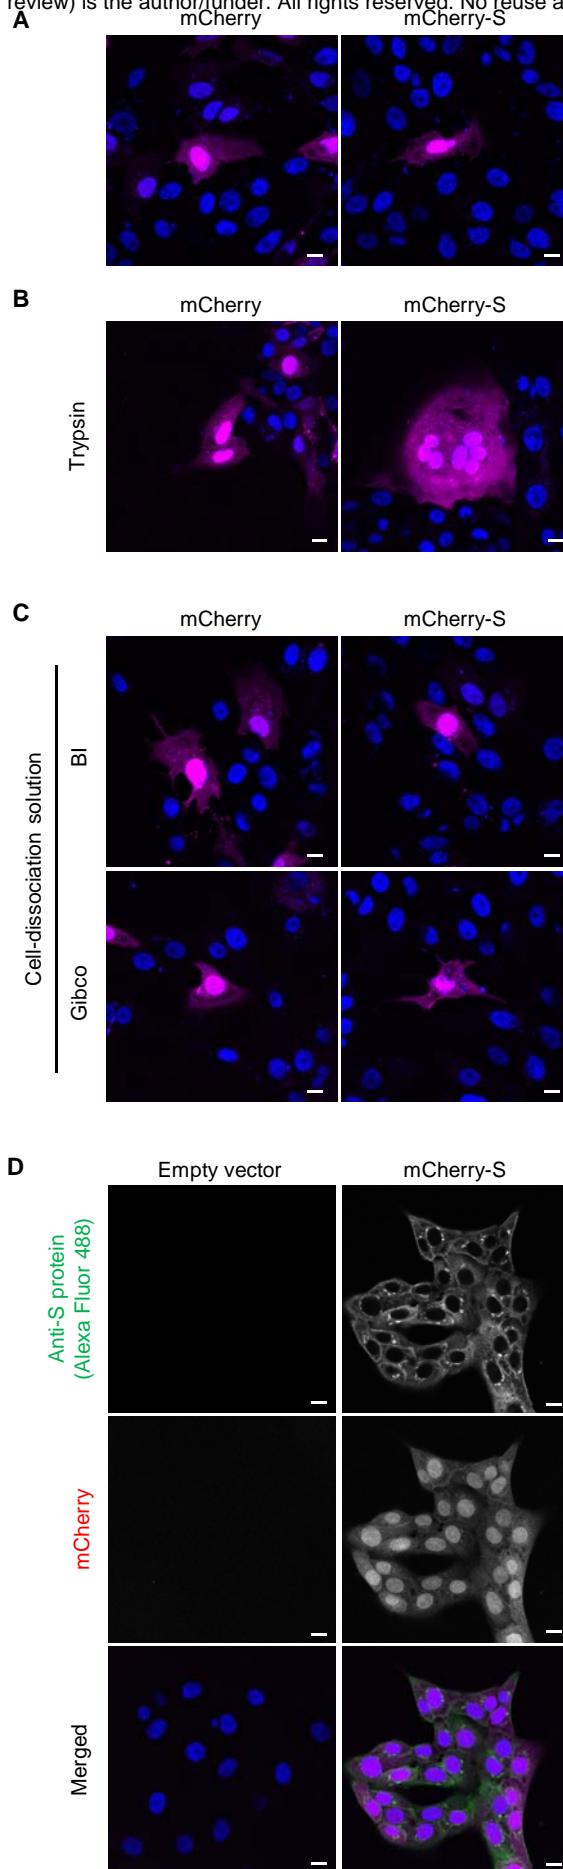

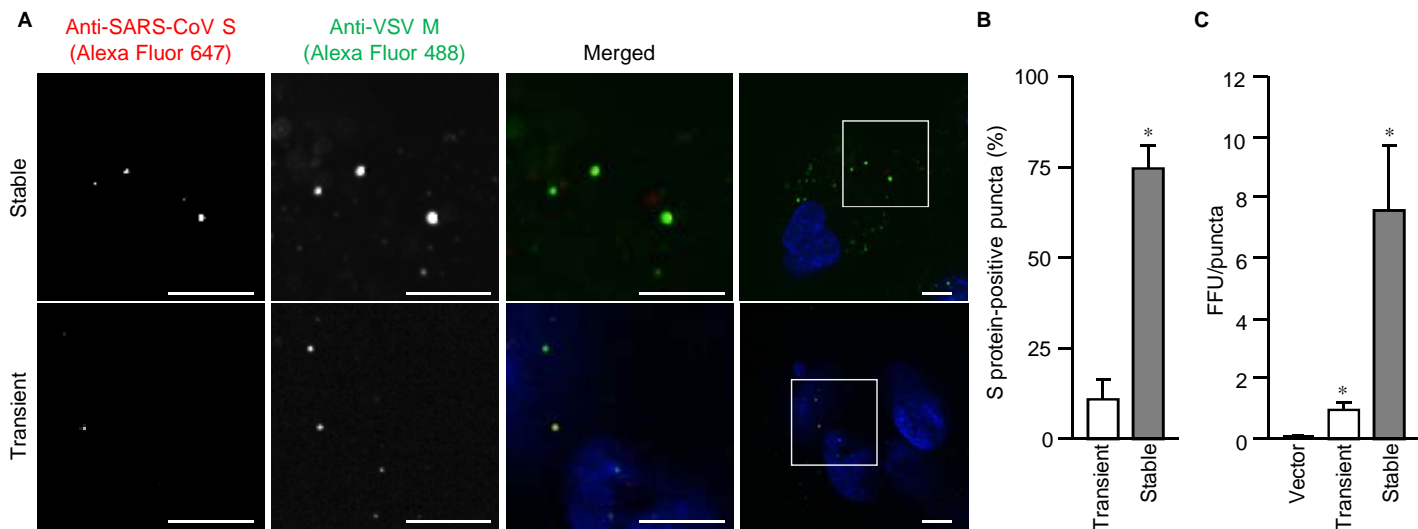

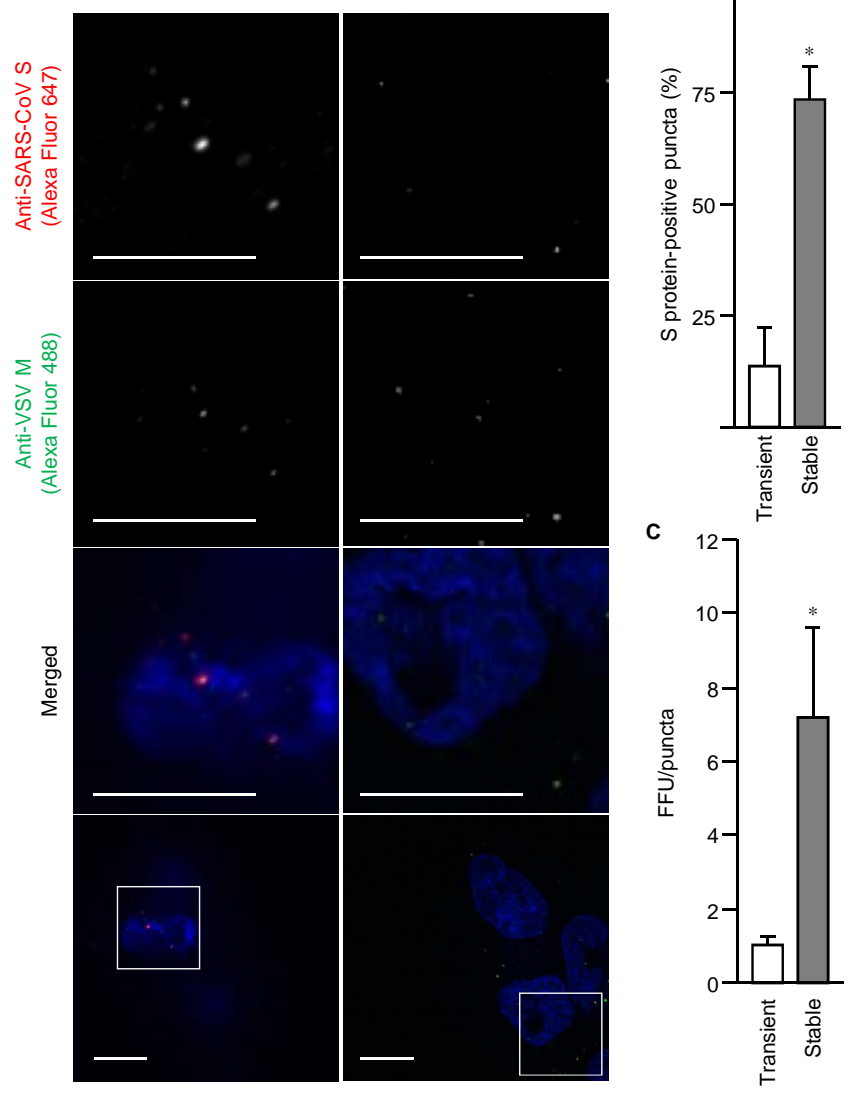

Source: https://www.biorxiv.org/content/10.1101/2021.07.30.454063v1.full.pdf
